# Supplementary material for: Cypher and Enigma Homolog Protein Are Essential for Cardiac Development and Embryonic Survival
Source: PubMed Central journal article supplement — J Am Heart Assoc. 2015 May 5;4(5):e001950. doi: 10.1161/JAHA.115.001950 (PMC4599425; doi:10.1161/jaha.115.001950), 2015-05-05

## Supplemental Material

**Figure S1. ENH expression at E8.5 and E10.5**

Whole-mount RNA *in situ* hybridization analysis of ENH expression in a wild type embryo (right and left lateral views) at (A and B) E8.5 and (C and D) E10.5 using an ENH-specific probe.

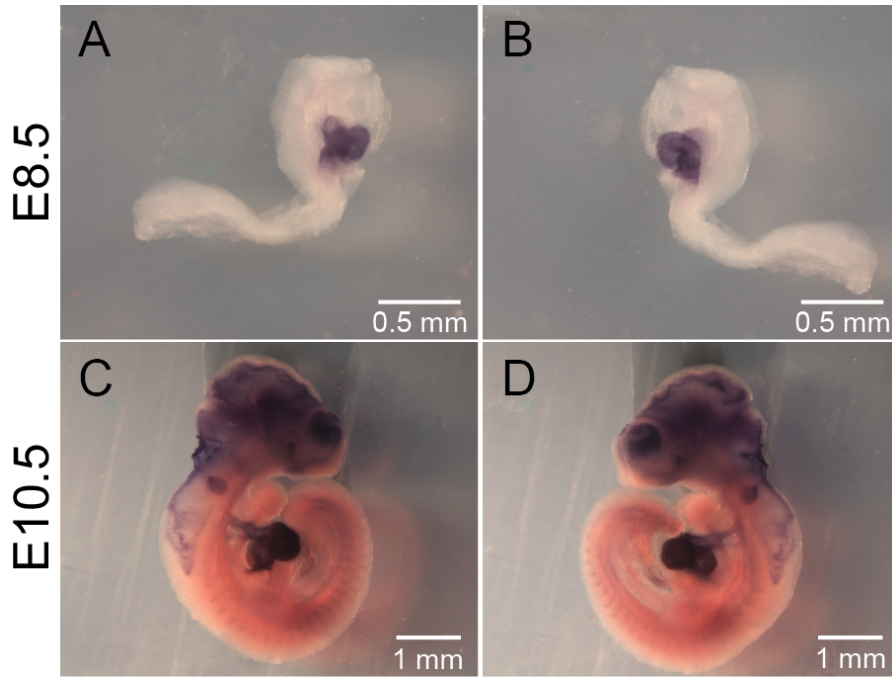

**Figure S2. Cypher ablation does not affect early heart development**

Whole-mount microscopic assessment of wild type and Cypher-null ( $Cypher^{-/-}$ ) embryos (left lateral view) at different developmental stages. (A) Wild type embryo and (B) somite-matched  $Cypher^{-/-}$  embryo at E9.5. (C) Wild type embryo and (D) somite-matched  $Cypher^{-/-}$  embryo at E10.5.

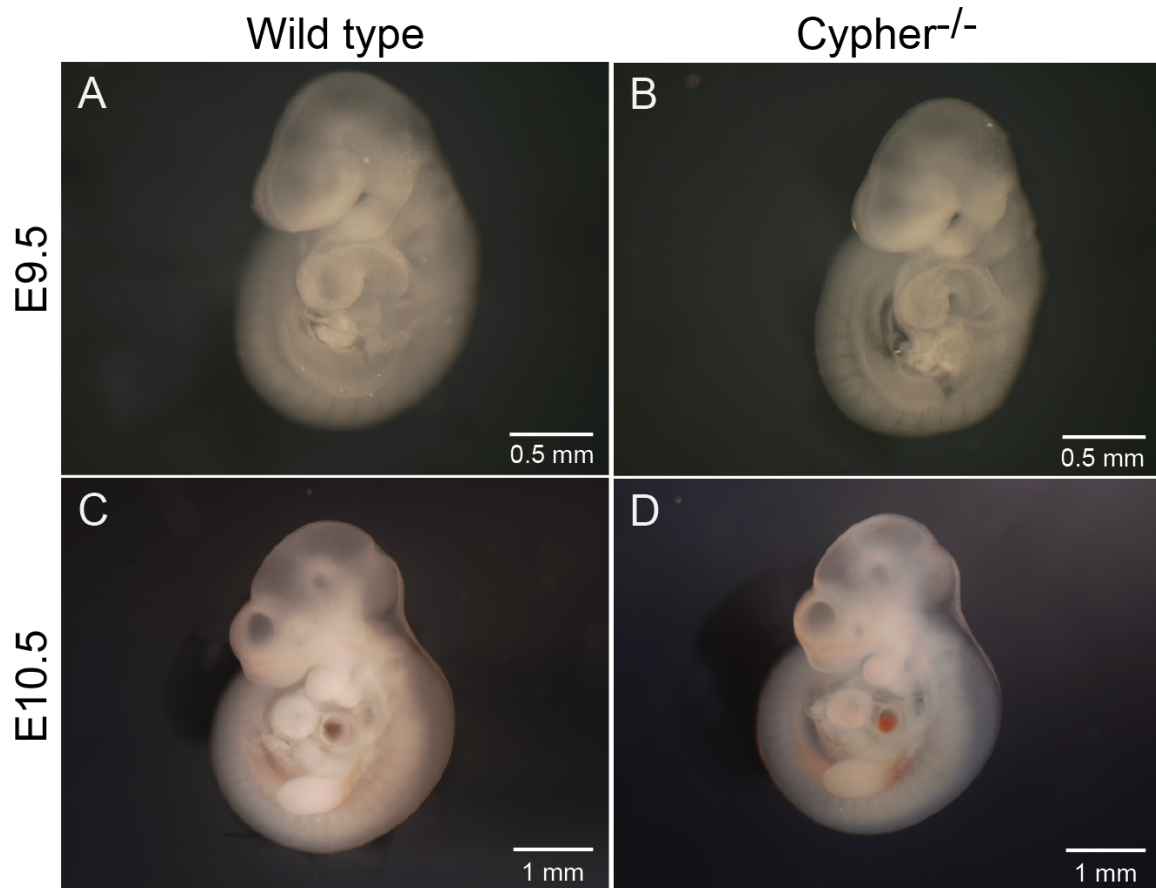

**Figure S3. ENH<sup>-/-</sup>/Cypher<sup>-/-</sup> hearts display no abnormalities in cardiomyocyte apoptosis or proliferation**

Immunofluorescence analysis of a transverse cryosection of the heart of (A and C) control and (B and D) somite-matched ENH<sup>-/-</sup>/Cypher<sup>-/-</sup> double knockout (dKO) embryos at E9.0-E9.5. Apoptosis and proliferation were stained using antibodies against (A and B) cleaved caspase 3, cCASP3 (green), and (C and D) phospho-histone H3, pHH3 (green), respectively. Sarcomeres were stained with anti- $\alpha$ -Actinin (red); DNA is stained with DAPI (blue). Note: due to thinning of the myocardium and severe dilation of the heart chamber, dKO hearts shrunk during sucrose processing.

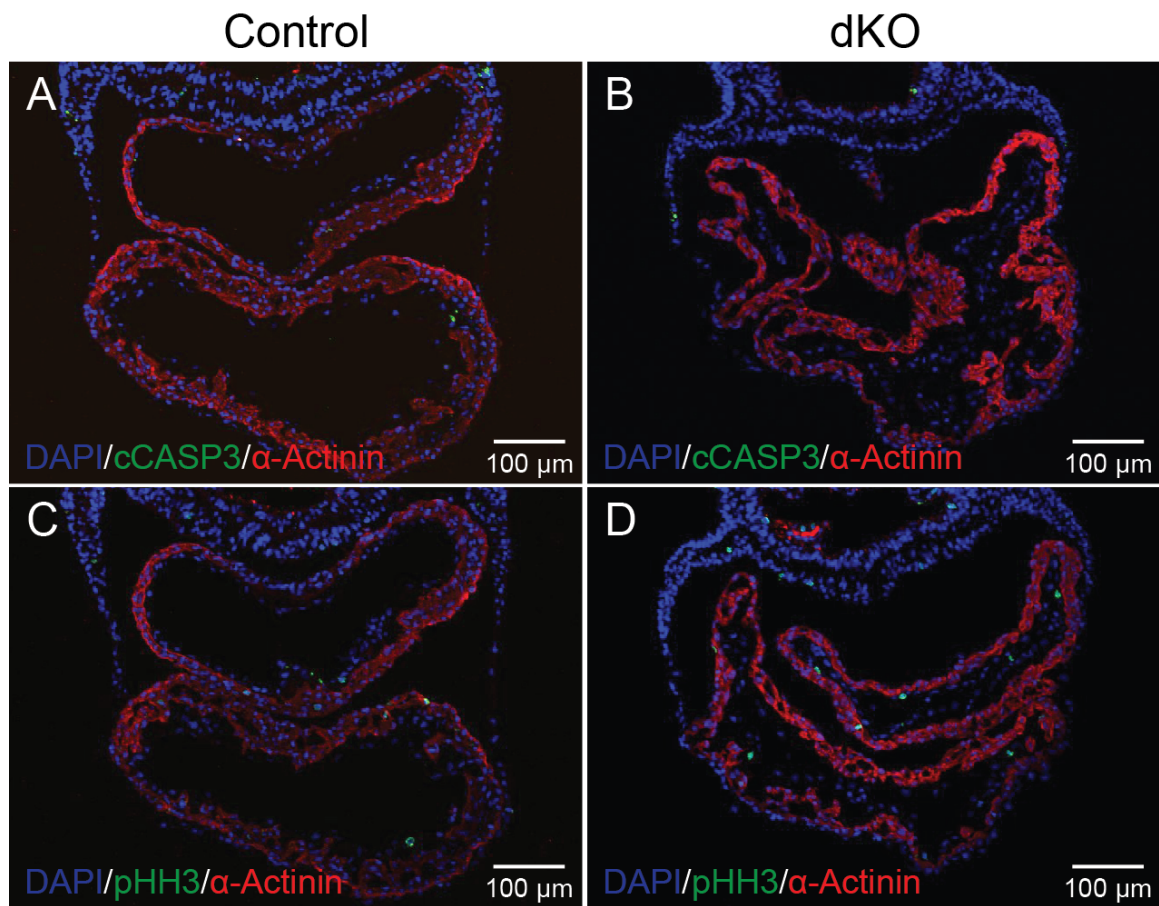

Supplement: jah30004-e001950-sd1.pdf [file jah30004-e001950-sd1.pdf]
